# Supplementary material for: Development of a decision support system for tsunami evacuation: application to the Jiyang District of Sanya city in China
Source: Copernicus journal article supplement (doi:10.5194/nhess-17-335-2017), 2017-03-08
Supplement: Supplementary file 1 [file nhess-17-335-2017-supplement.zip]

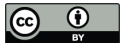

## *Supplement of*

# **Development of a decision support system for tsunami evacuation: application to the Jiyang District of Sanya city in China**

**Jingming Hou et al.**

*Correspondence to:* Jingming Hou (houjingming1982@126.com)

- nhess-17-335-2017-supplement-title-page.pdf
- Bus\_Pick-up.dbf
- Bus\_Pick-up.sbn
- Bus\_Pick-up.sbx
- Bus\_Pick-up.shp
- Bus\_Pick-up.shx
- Evacuation\_cost.tfw
- Evacuation\_cost.tif
- Evacuation\_cost.tif.aux.xml
- Evacuation\_cost.tif.ovr
- Handbook of Tsunami Evacuation Planning.pdf
- Historical Tsunami Data.txt
- Main\_evacuation\_routes.dbf
- Main\_evacuation\_routes.prj
- Main\_evacuation\_routes.sbn
- Main\_evacuation\_routes.sbx
- Main\_evacuation\_routes.shp
- Main\_evacuation\_routes.shp.xml
- Main\_evacuation\_routes.shx
- Maximum amplitude1.tfw

- Maximum amplitude1.tif
- Maximum amplitude1.tif.aux.xml
- Maximum amplitude1.tif.ovr
- inundation\_area.dbf
- inundation\_area.prj
- inundation\_area.sbn
- inundation\_area.sbx
- inundation\_area.shp
- inundation\_area.shx
- road\_of\_luhuitou.dbf
- road\_of\_luhuitou.prj
- road\_of\_luhuitou.sbn
- road\_of\_luhuitou.sbx
- road\_of\_luhuitou.shp
- road\_of\_luhuitou.shp.xml
- road\_of\_luhuitou.shx
- tsunami\_travel\_time.dbf
- tsunami\_travel\_time.prj
- tsunami\_travel\_time.sbn
- tsunami\_travel\_time.sbx
- tsunami\_travel\_time.shp
- tsunami\_travel\_time.shx
- vertical\_shelters of Luhuitou.dbf
- vertical\_shelters of Luhuitou.sbn
- vertical\_shelters of Luhuitou.sbx
- vertical\_shelters of Luhuitou.shp
- vertical\_shelters of Luhuitou.shx

The copyright of individual parts of the supplement might differ from the CC-BY 3.0 licence.
